# Supplementary material
Source: Royal Society of Chemistry journal article supplement (doi:10.1039/d6nj00645k)
Supplement: d6nj00645k1.pdf [file d6nj00645k1.pdf]

## Pore-Size Engineering of Imine-Linked Covalent Organic Frameworks for Decoupling Th(IV) Adsorption Capacity and Kinetics

### S1 Synthesis of COF-1:

TFPPy (62.1 mg) and PyTTA (56.7 mg) were added to 10 mL Pyrex tubes, followed by 1 mL of mesitylene, 1 mL of dioxane, 0.7 mL of N, N-dimethylacetamide and 0.2 mL of acetic acid (3 mol/L). Ultrasound for 3 minutes. Subsequently, the tubes were subjected to flash freezing with liquid nitrogen at 77K and degassed three times through a freeze-pump-thawing cycle. After that, heat the tube at 140°C for 72 hours. When the reaction is completed, cool the tube to room temperature, clean it with N, N-dimethylacetamide, and purify the resulting yellow precipitate with anhydrous tetrahydrofuran using the Soxhlet extraction method for 24 hours. Finally, the material was vacuum-dried at 120°C to obtain the earth-yellow solid powder COF-1, with a yield of 90.2mg and a yield rate of 76%.

### S2 Synthesis of COF-2:

TFPPy (15.0 mg) and PDA (5.22 mg) were added to 10 mL Pyrex tubes, o-dichlorobenzene/n-butanol mixed solvent (1 mL, volume ratio 1:1) and acetic acid (6 M, 0.1 mL) were added successively. The mixture was ultrasonically treated for 10 minutes, then degassed through three cycles of freezing - degassing - thawing, and sealed under vacuum. The mixture was heated and reacted at 120 ° C for 96 hours. After the reaction was completed, the precipitate was collected, washed with tetrahydrofuran, and then vacuum-dried overnight at 120 ° C. Eventually, yellow powder-like COF-2 was obtained.

### S3 SEM (a) and EDS (b) images of COF-1 after Th(IV) adsorption, as well as SEM (c) and EDS (d) images of COF-2 after adsorption

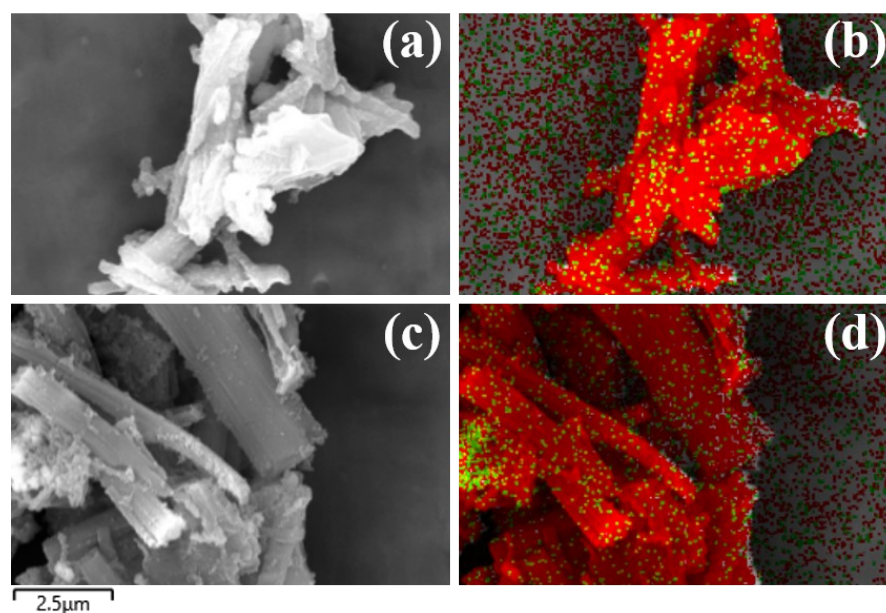

**S4. XPS spectra of COF-1 and COF-2 before Th(IV) adsorption**

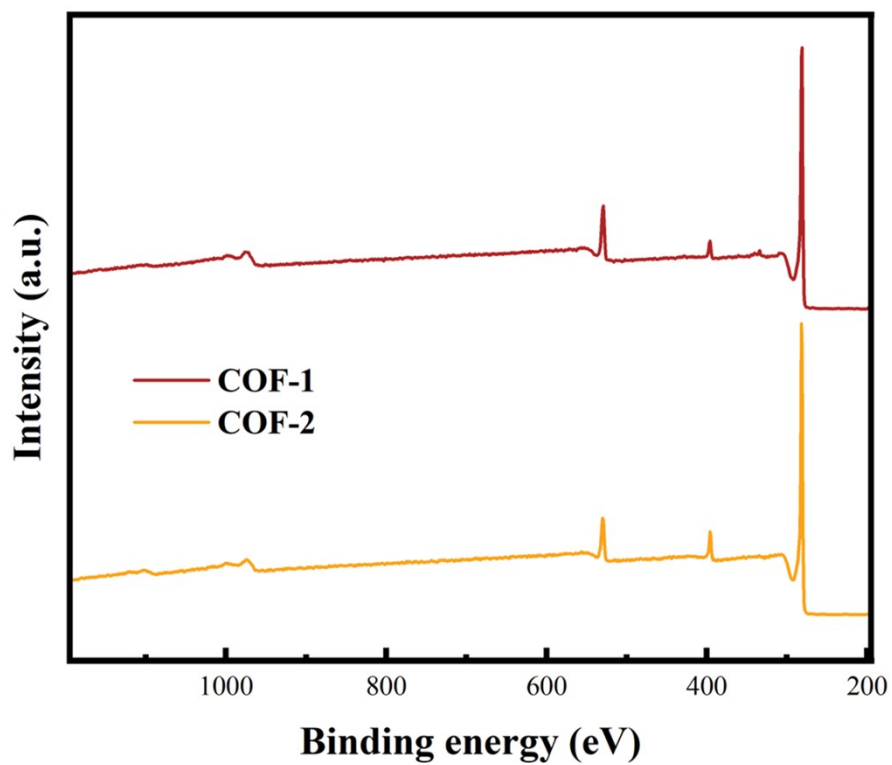

**S5. XPS spectra of COF-1 and COF-2 after Th(IV) adsorption**

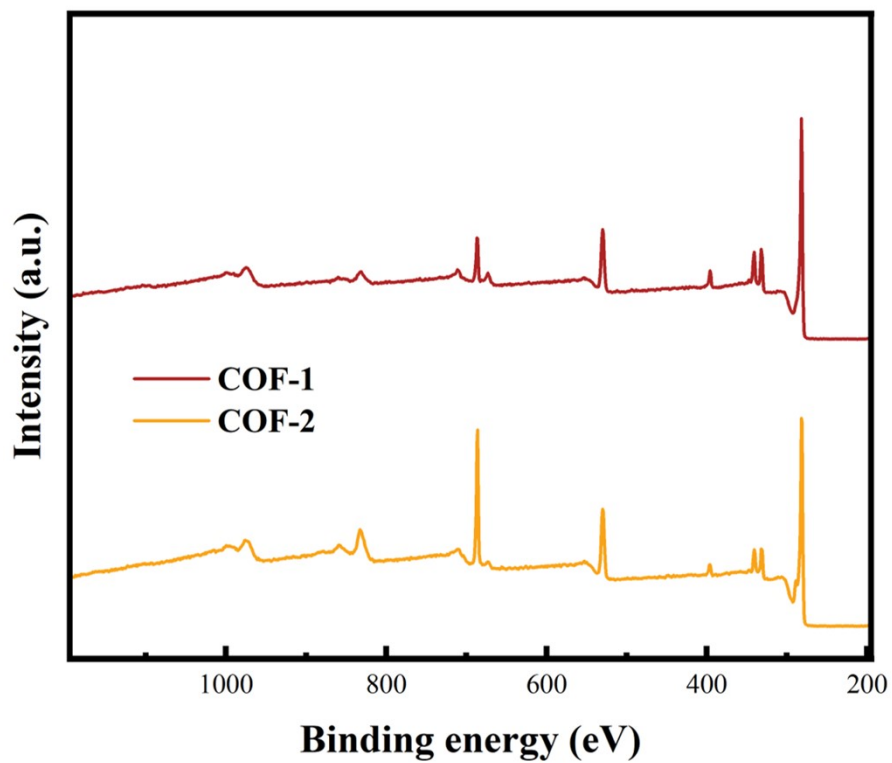

**S6. Th 4f high-resolution XPS spectra of COF-1 and COF-2 after Th(IV) adsorption**

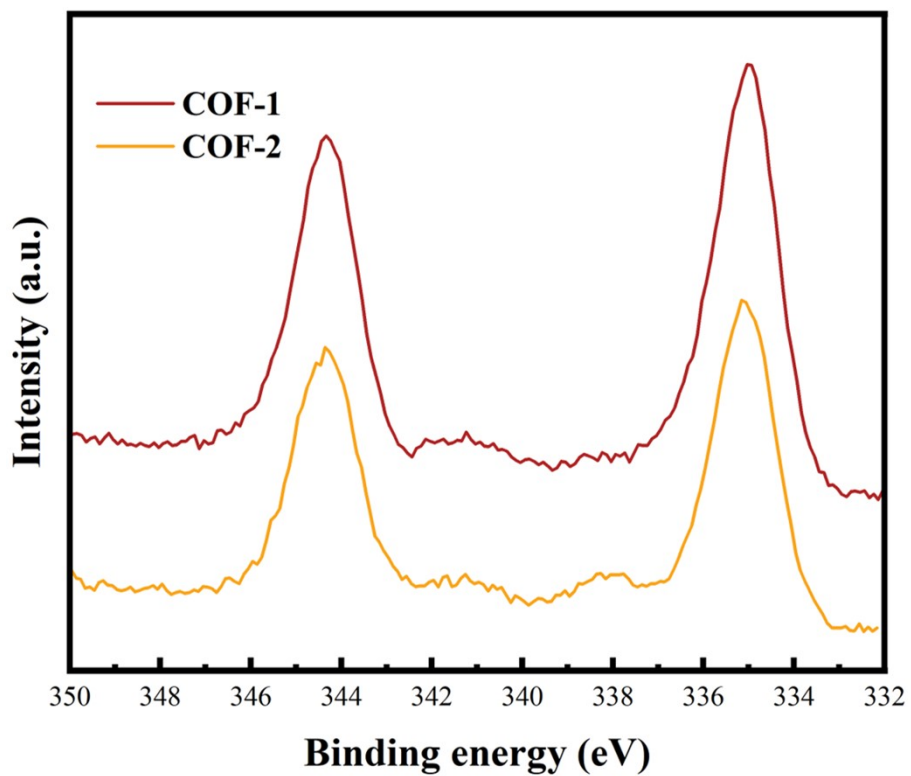

**S7. Pore size distributions of COF-1 and COF-2 determined by non-local density functional theory (NLDFT) analysis.**

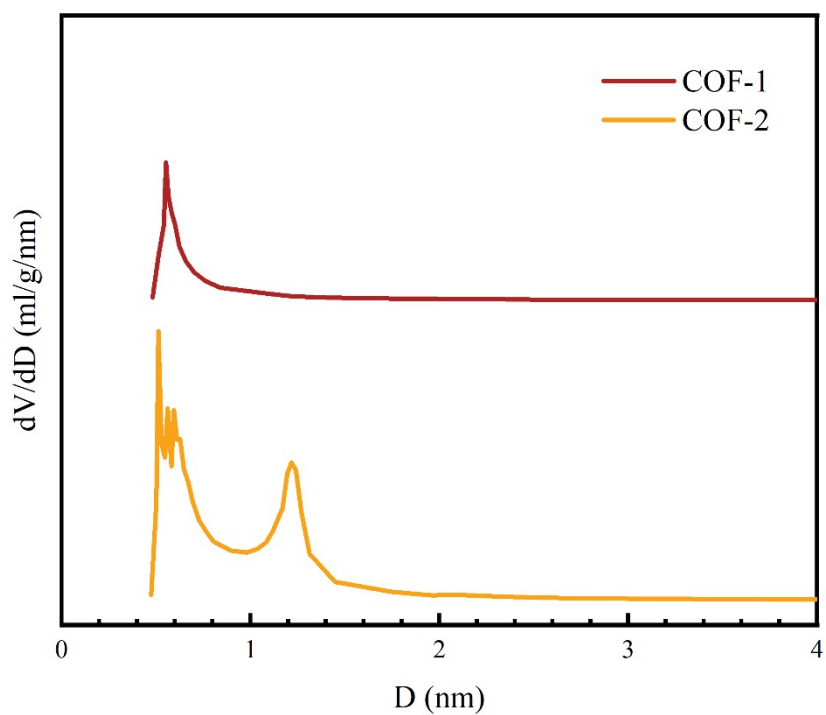

**S8. Pawley refinement profiles of simulated and experimental PXRD patterns for COF-1 and COF-2, with Rwp values indicating goodness of fit.**

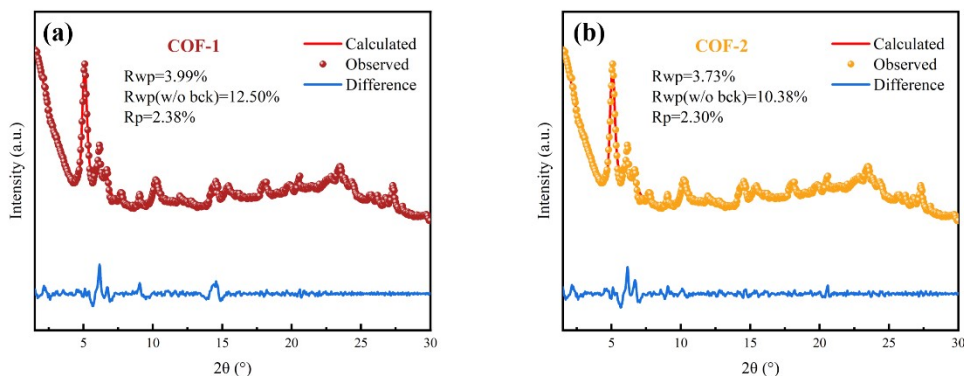

**S9. Elemental composition (EDS) and normalized adsorption capacity of COF-1 and COF-2.**

| Sample | N content (wt%) | Active site density* (mmol/g) | Q <sub>e</sub> (mg/g) | Q <sub>mmol</sub> (mmol/g) | Ratio (Q <sub>mmol</sub> /site) |
|--------|-----------------|-------------------------------|-----------------------|----------------------------|---------------------------------|
| COF-1  | 29.30           | 20.93                         | 200                   | 0.862                      | 0.0412                          |
| COF-2  | 26.14           | 18.67                         | 178                   | 0.767                      | 0.0411                          |

**S10. Powder X-ray diffraction (PXRD) patterns of COF-1 and COF-2 after five consecutive adsorption-desorption cycles.**

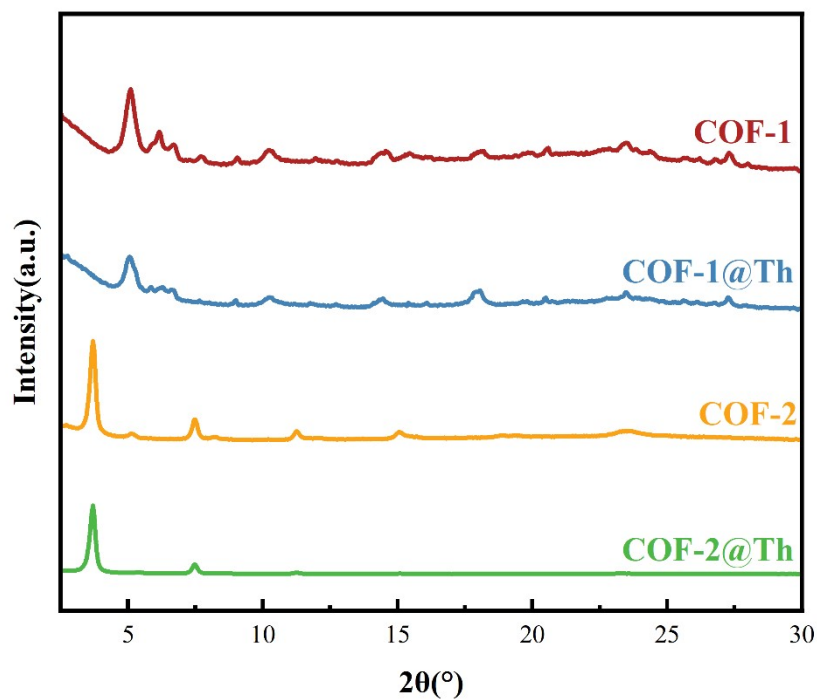

**S11. Performance comparison of recently reported adsorbents for Th(IV) adsorption**

| Material                                        | Type                          | $Q_m$<br>( $\text{mg}\cdot\text{g}^{-1}$ ) | Equilibrium<br>time | Key design strategy                                     |
|-------------------------------------------------|-------------------------------|--------------------------------------------|---------------------|---------------------------------------------------------|
| $\text{SiO}_2@\text{Al-MOF}$                    | MOF-based<br>composite        | 1707.0                                     | ~300 min            | Silica<br>reinforcement; O-<br>donor sites              |
| TAPT-DHTA<br>COF                                | COF (N,O-<br>functionalized)  | 1394.0                                     | ~60 min             | Bidentate N,O-<br>chelating ligands                     |
| Al-MOF                                          | MOF                           | 1324.6                                     | ~180 min            | High-density<br>carboxylate sites                       |
| Py-TFIm-25<br>COF                               | COF<br>(imidazole)            | 808.0                                      | ~1 min              | Imidazole N-sites<br>(Im vs. C=N)                       |
| Oxygen-rich<br>microporous<br>carbon            | Carbon                        | 625.0                                      | —                   | Oxygen functional<br>groups + micropore<br>sieving      |
| ABI-COF                                         | COF<br>(imidazole)            | 617.0                                      | ~3 min              | High imidazole<br>content N-sites                       |
| 3D-Por-COF-<br>A                                | COF<br>(porphyrin)            | 575.2                                      | ~20 min<br>(90%)    | Porphyrin + imine<br>dual N-sites                       |
| Hb-TMT COF                                      | COF ( $\text{sp}^2\text{c}$ ) | 543.5                                      | ~5 min              | Hydroxyl-<br>functionalized N,O<br>synergy              |
| DhaTph COF                                      | COF (Lewis<br>base)           | 525.0                                      | ~90 min             | Lewis base C=N<br>and -OH sites                         |
| MNPs-<br>SA@Cu MOF                              | MOF<br>composite              | 434.8                                      | ~10 min             | Magnetic alginate-<br>Cu MOF beads                      |
| DFB-TMT<br>COF                                  | COF ( $\text{sp}^2\text{c}$ ) | 377.4                                      | ~3 min              | $\text{sp}^2\text{c}$ -conjugated<br>triazine N-sites   |
| UiO-66- $\text{PO}_3$                           | MOF<br>(phosphonic<br>acid)   | 320.0                                      | ~180 min            | Phosphonic acid<br>functionalization                    |
| $\text{g-C}_3\text{N}_4/\text{AX}$<br>electrode | Carbon nitride<br>composite   | 275.7                                      | ~30 min             | Amidoxime-<br>modified electrode                        |
| COF-1 (this<br>work)                            | COF (imine)                   | 199.8                                      | ~40 min             | Dense linker →<br>high N-density,<br>capacity-optimized |
| COF-2 (this                                     | COF (imine)                   | 177.9                                      | ~40 min             | Open linker → fast                                      |

---

| Material | Type | $Q_m$<br>( $\text{mg}\cdot\text{g}^{-1}$ ) | Equilibrium<br>time | Key design strategy                  |
|----------|------|--------------------------------------------|---------------------|--------------------------------------|
| work)    |      |                                            |                     | mass transfer,<br>kinetics-optimized |

---
